# Supplementary material for: Predicting Hospital Length of Stay at Admission Using Global and Country-Specific Competing Risk Analysis of Structural, Patient, and Nutrition-Related Data from nutritionDay 2007–2015
Source: MDPI journal article supplement (doi:10.3390/nu13114111), 2021-11-16

Figure S1  
Global model: multivariable cause-specific Cox proportional hazards competing risks results

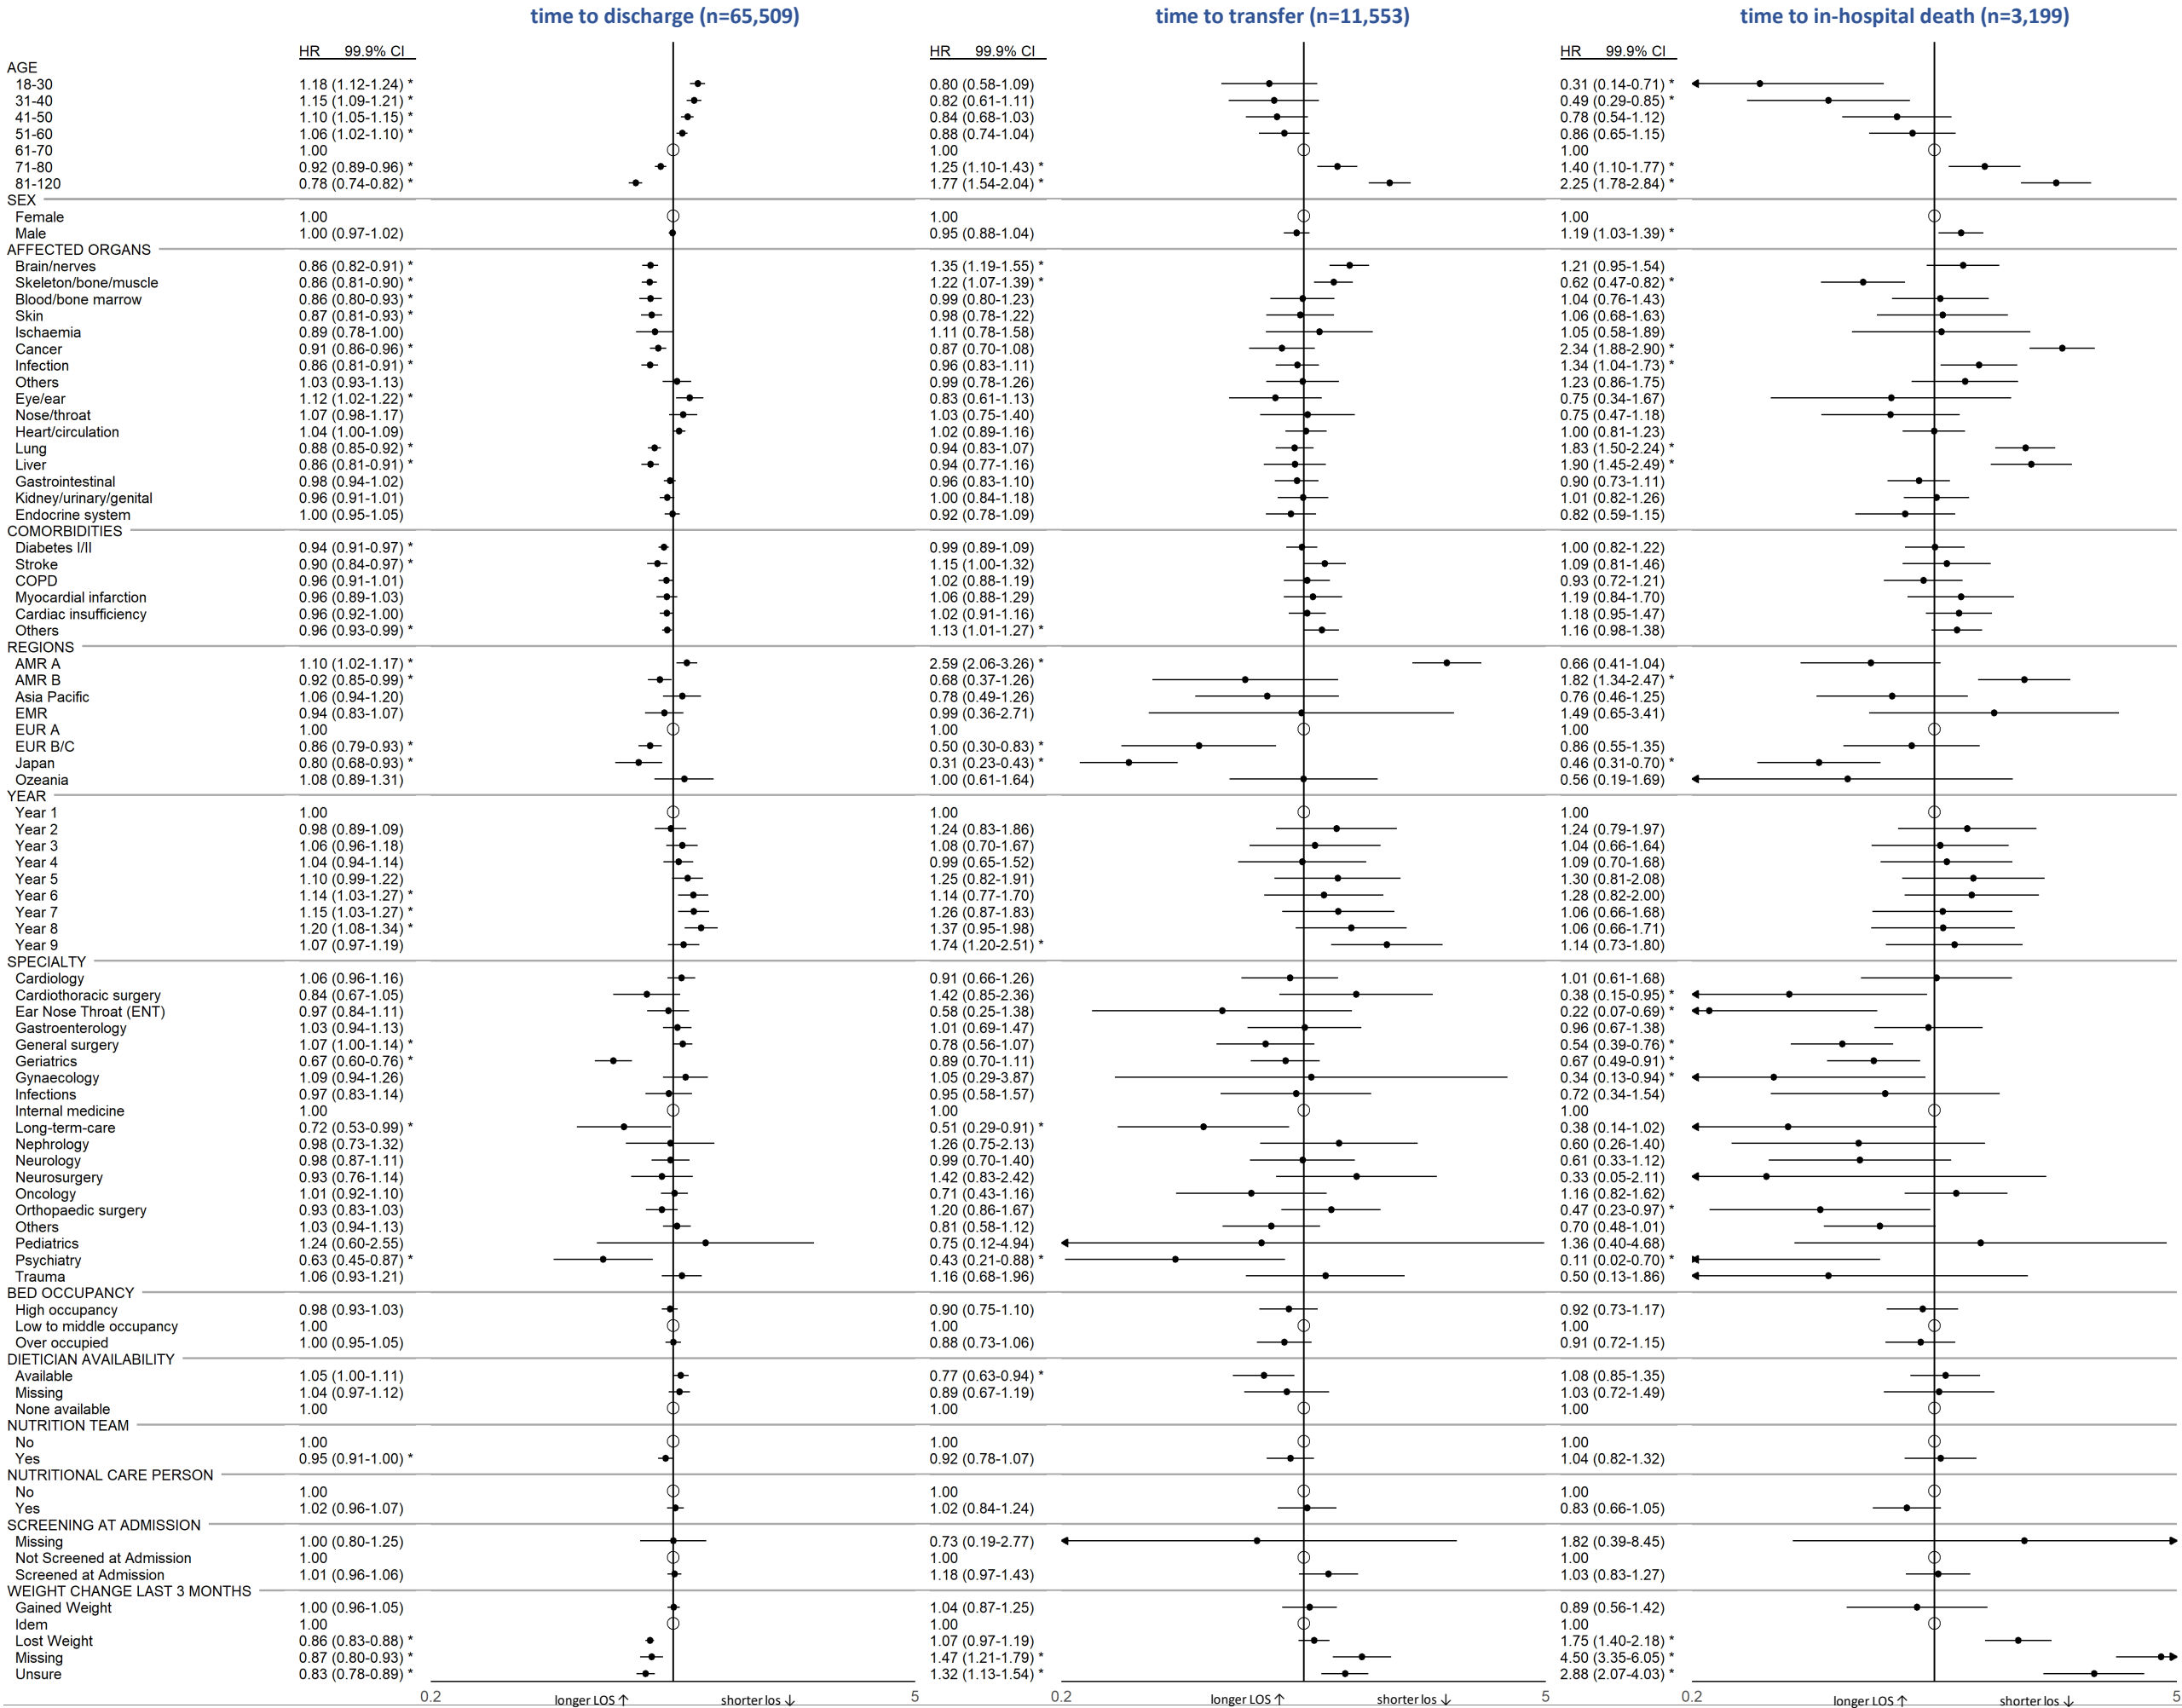

Supplement: s1 [file s1]
